# Supplementary material for: Application of an Ecotoxicological Battery Test to the Paddy Field Soils of the Albufera Natural Park
Source: MDPI journal article supplement (doi:10.3390/toxics10070375), 2022-07-05
Supplement: s1 [file s1]

# Supplementary Materials: Application of an Ecotoxicological Battery Test to the Paddy Field Soils of the Albufera Natural Park

Oscar Andreu Sánchez, Jesús Moratalla López, José Antonio Rodríguez Martín and Luis Roca Pérez

**Table S1.** Growth rate inhibitory effect (I%).

| Sample Sites | Exposure Concentration (% of leachate) |         |        |        |        |
|--------------|----------------------------------------|---------|--------|--------|--------|
|              | 3.12%                                  | 6.25%   | 12.5%  | 25%    | 50%    |
| S1           | -0.0134                                | -0.0039 | 0.0032 | 0.0041 | 0.0890 |
| S2           | -0.0119                                | -0.0053 | 0.0073 | 0.0052 | 0.0903 |
| S3           | -0.0140                                | -0.0046 | 0.0093 | 0.0081 | 0.0981 |
| S4           | -0.0012                                | -0.0100 | 0.0210 | 0.1210 | 0.3732 |

Negative values denote growth stimulation.

**Table S2.** Probit curve fitting values.

| Data             | Sample Sites        |                    |                     |                  |
|------------------|---------------------|--------------------|---------------------|------------------|
|                  | S1                  | S2                 | S3                  | S4               |
| <b>Intercept</b> |                     |                    |                     |                  |
| Value            | -3.7632             | -3.3845            | -2.73038            | 0.26296          |
| Std. Err.        | 0.96018             | 0.87548            | 0.7201              | 0.5620           |
| C.I.(95%)        | -5.64522 / -1.88129 | -5.1005 / -1.66862 | -4.14179 / 1.318964 | -0.8385 / 1.3645 |
| <b>Slope</b>     |                     |                    |                     |                  |
| Value            | 4.3654              | 0.875483           | 3.79016             | 2.5771           |
| Std. Err.        | 0.5745              | 0.52537            | 0.434970            | 0.3711           |
| C.I.(95%)        | 3.2393 / 5.4916     | 3.1167 / 5.1761    | 2.9376 / 4.6427     | 1.8497 / 3.3044  |

Std. Err: Standard Error. CI95%: Confidence Intervals ( 95%).

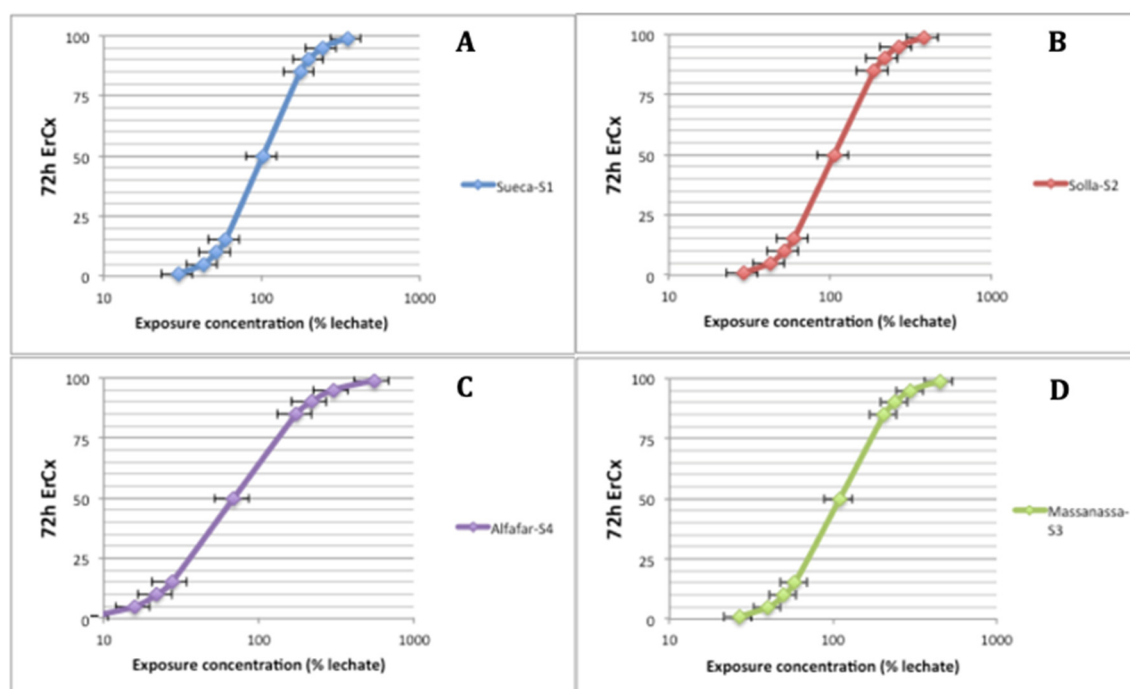

**Figure S1.** Probit regression curves for the *R. subcapitata* assay. X-axis: exposure concentration expressed as % of leachate. Y-axis: 72h ErCx. Error bars denote the interval of confidence (95%). Sample sites: A) S1, B) S2, C) S3 and D) S4.

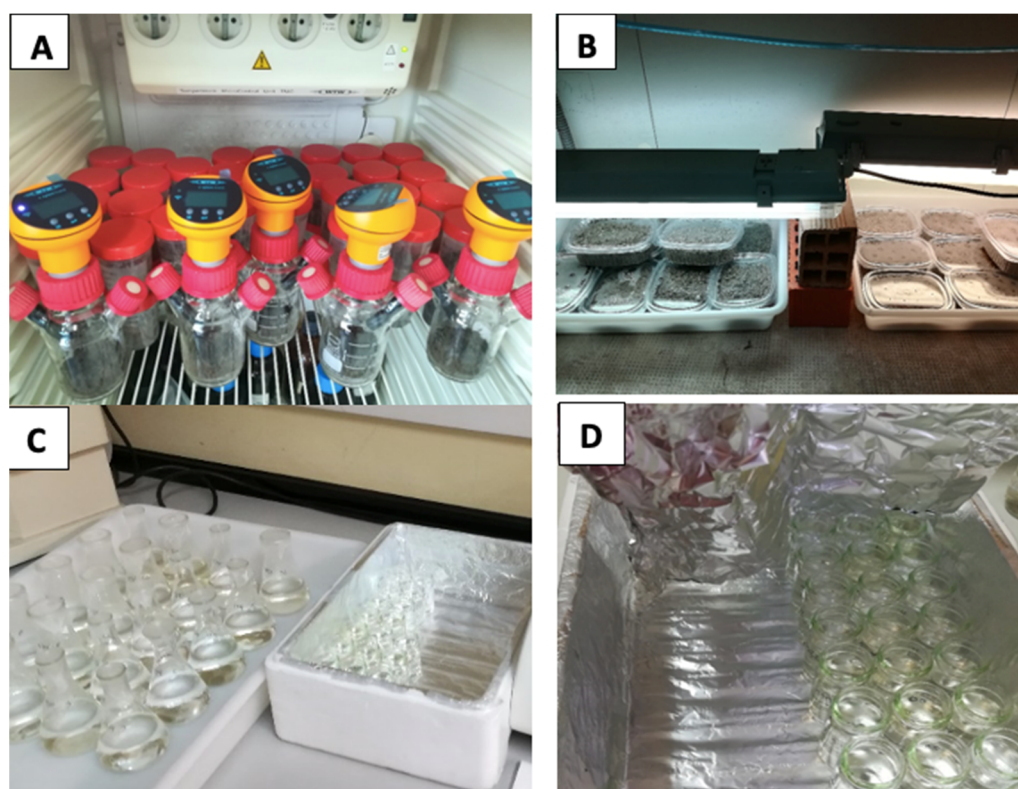

**Figure S2.** Experimental photography. (A) Respirirometry bottles with Oxitop™ system for carbon fixation assay (OECD TG 216). (B) Plastic containers for the earthworms mortality assay (OECD TG 207). (C) Erlenmeyer flasks with different contraptions of leachate inoculated with *R. subcapitata* (OECD TG 201). (D) Trays with rinsing vials for *D. magna* assay (OECD TG 202).
